# Supplementary material
Source: MDPI journal article supplement (https://www.mdpi.com/2076-3298/10/7/121)
Supplement: s1 [file s1]

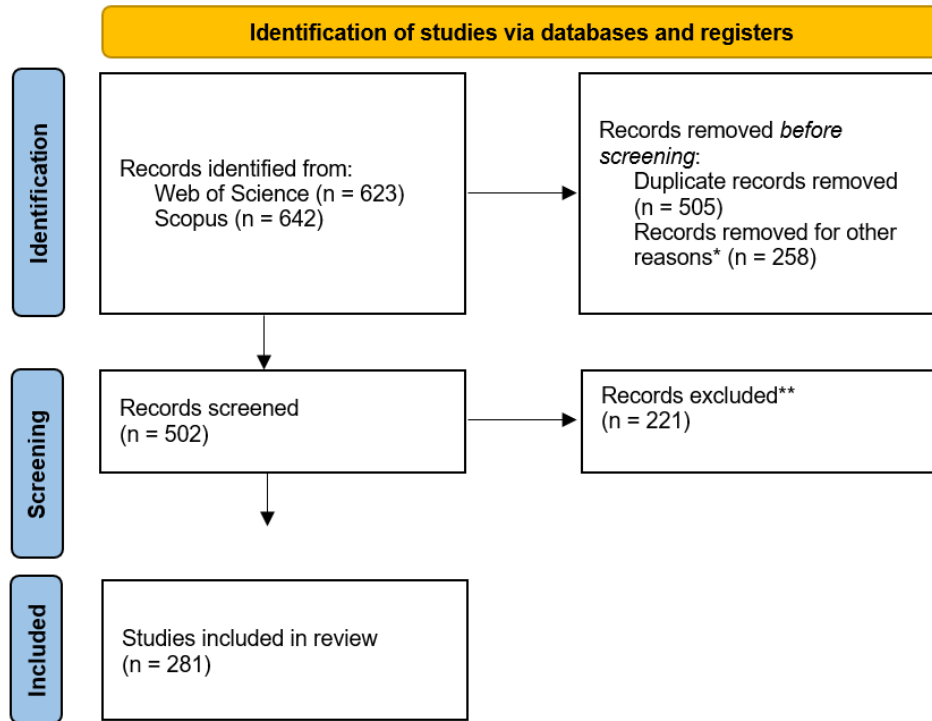

Figure S1. Flow diagram of the systematic literature review on artificial reefs.

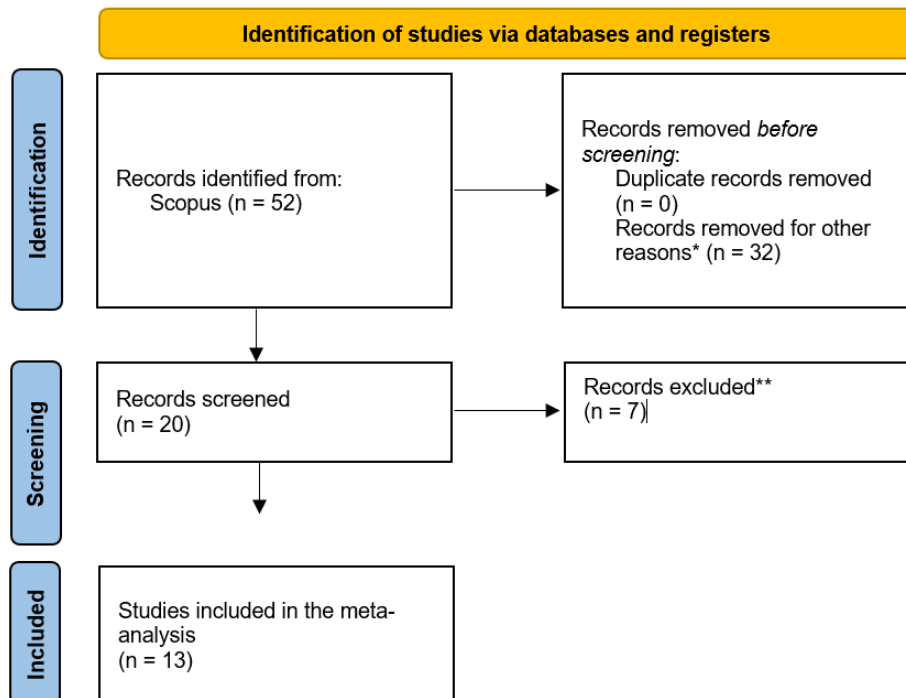

Figure S2. Flow diagram of the supplementary systematic literature review on artificial reefs effectiveness.

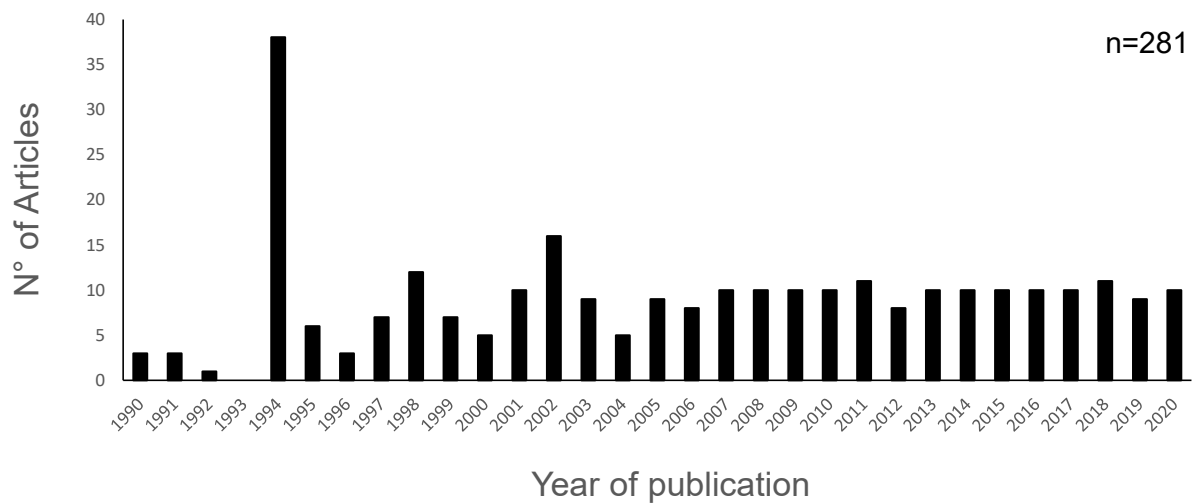

Figure S3. Number of studies on ARs during the period 1990-2020.

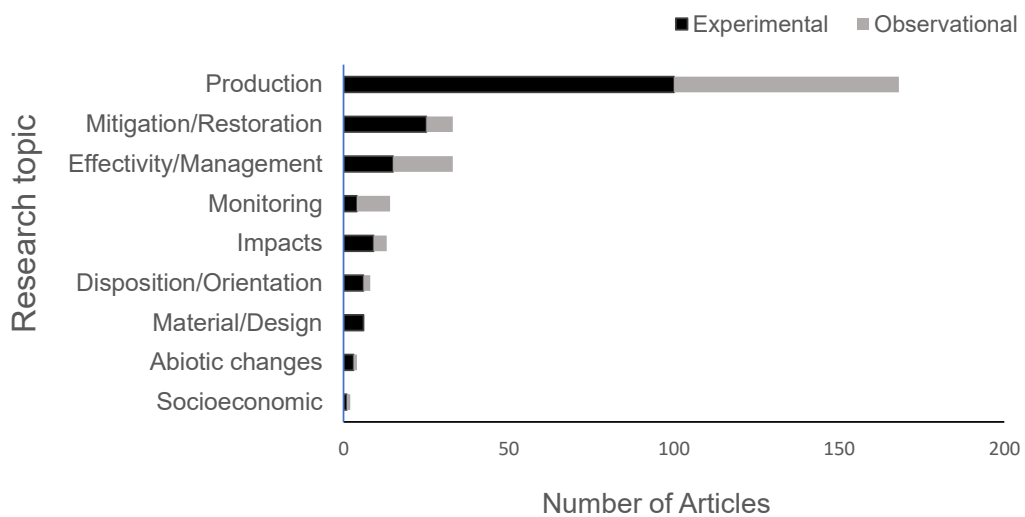

Figure S4. Main research topics found in studies of artificial reefs by type of research.

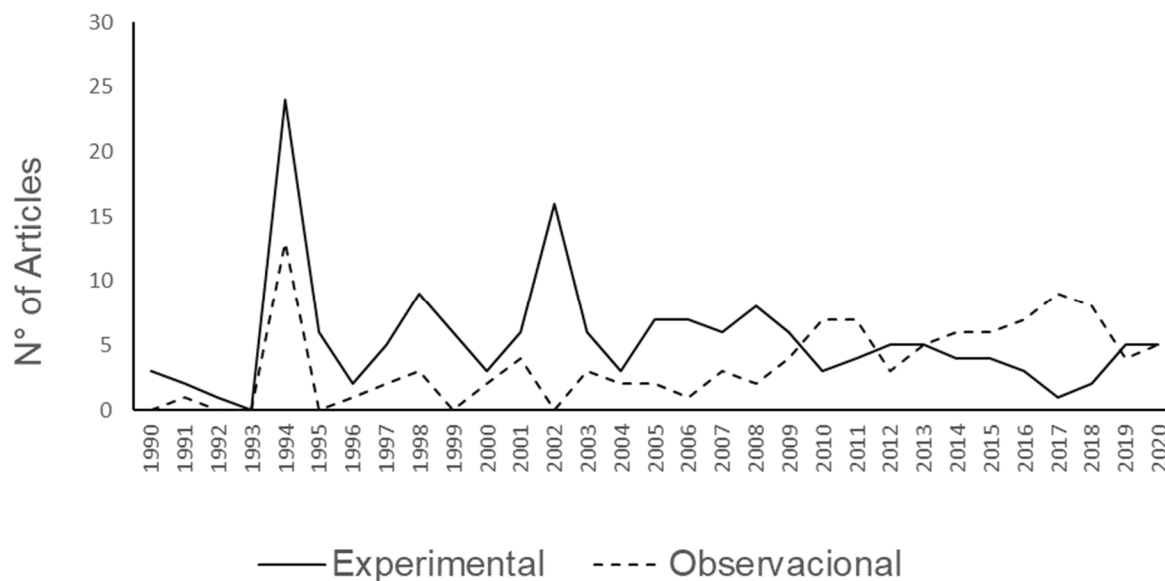

Figure S5. Number of experimental and observational surveys during the period 1990-2020.

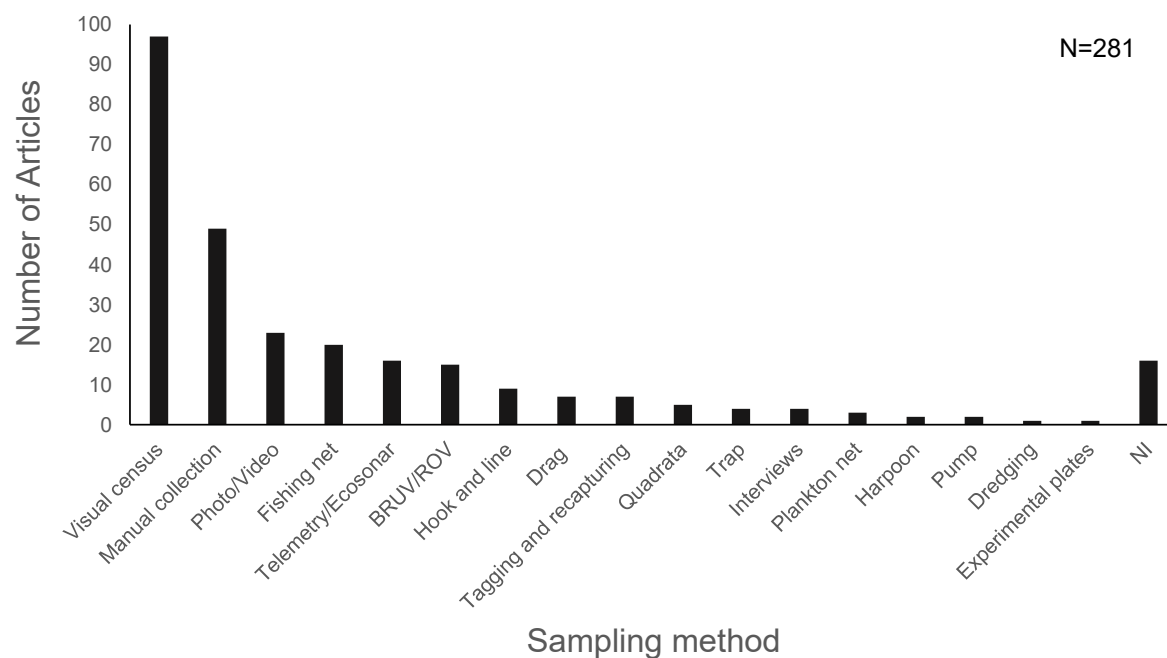

Figure S6. Sampling methods used in studies related to ARs during the period of 1990-2020.

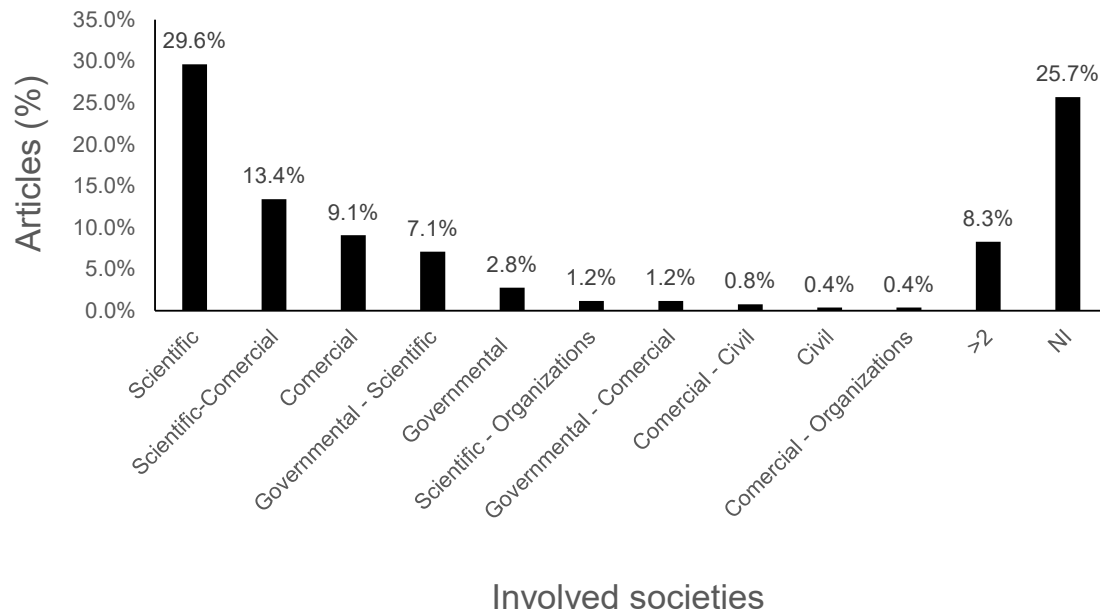

Figure S7. Society members involved in studies around ARs.

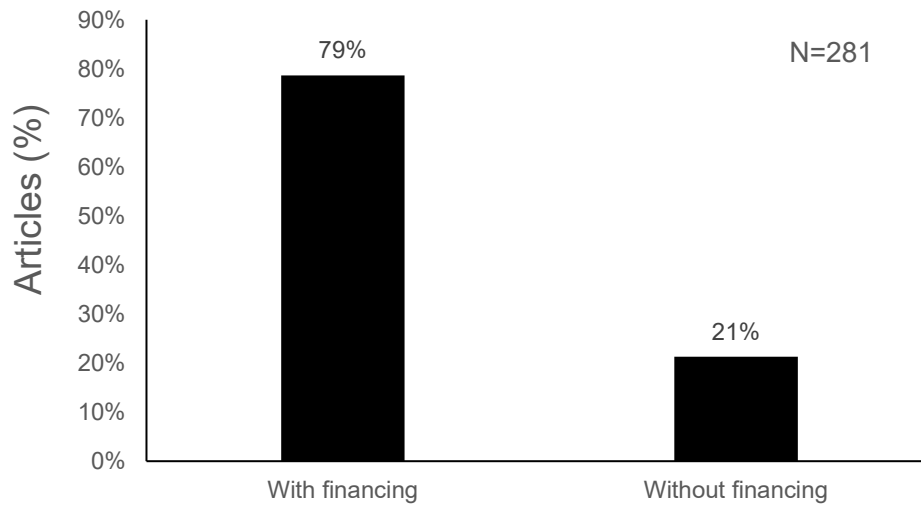

Figure S8. Studies of ARs regarding their financing support

Table S1. Ecosystem type and substrate in which ARs were deployed.

| Substrate          | Ecosystem |            |           |            |    |
|--------------------|-----------|------------|-----------|------------|----|
|                    | Marine    | Freshwater | Estuarine | Laboratory | NI |
| Water column       | 2         |            |           | 3          |    |
| Sand               | 60        |            | 1         |            | 1  |
| Muddy-Sand         | 28        |            | 1         |            |    |
| Sand-Reef          | 5         |            |           |            |    |
| Sand-Rocky         | 2         |            |           |            |    |
| Sand-Phanerogams   | 5         |            |           |            |    |
| Sand-Algae         | 2         |            |           |            |    |
| Mud                | 5         |            |           |            |    |
| Phanerogams        | 13        |            |           |            |    |
| Gravel             | 1         |            |           |            |    |
| Muddy-sandy gravel |           |            | 1         |            |    |
| Sandy gravel       | 5         |            | 1         |            |    |
| Rocky              | 10        |            |           |            |    |
| Reef               | 11        |            |           |            |    |
| > 2 substrates     | 6         |            |           |            |    |
| NI                 | 105       | 3          | 8         |            | 2  |

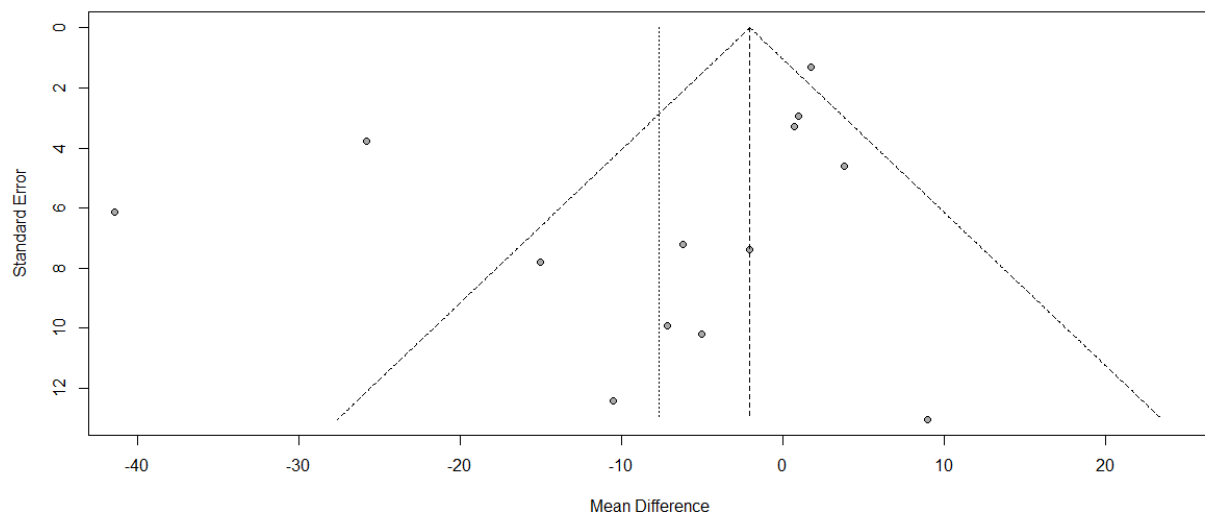

Figure S9. Funnel plot on meta-analysis of ARs effectiveness for marine ecosystem restoration
